# Supplementary material for: Nutrient Constituents, Bioactive Phytochemicals, and Antioxidant Properties of Service Tree (Sorbus domestica L.) Fruits
Source: MDPI journal article supplement (doi:10.3390/plants11141832), 2022-07-13
Supplement: s1 [file s1]

Supplementary Material

**Table S1.** Amino acid score of service tree protein compared with the amino acids of standard and bovine milk protein, %.

| Amino acids | Compared with indispensable amino acid requirements | Compared with the total protein of bovine milk |
|-------------|-----------------------------------------------------|------------------------------------------------|
| His         | 313                                                 | 167                                            |
| Val         | 149                                                 | 85                                             |
| Leu         | 93                                                  | 53                                             |
| Ile         | 130                                                 | 63                                             |
| Thr         | 140                                                 | 67                                             |
| Lys         | 102                                                 | 55                                             |
| Phe+Tyr     | 184                                                 | 65                                             |
| Met+Cys     | 186                                                 | 141                                            |

**Table S2.** Ratio of polyunsaturated (PUFA) and saturated (SFA) fatty acids, atherogenic, thrombogenic, and cholesterolemic indexes of the glyceride oil.

| Lipid indexes                         | Value |
|---------------------------------------|-------|
| PUFA/SFA                              | 2.0   |
| Index of atherogenicity <sup>a</sup>  | 0.3   |
| Index of thrombogenicity <sup>b</sup> | 0.6   |
| Cholesterolemic index <sup>c</sup>    | 3.8   |

<sup>a</sup>Index of atherogenicity =  $(C_{12:0} + 4 \times C_{14:0} + C_{16:0}) / [\Sigma MUFA + \Sigma PUFA_{n-6 \text{ and } n-3}]$ .

<sup>b</sup>Index of thrombogenicity =  $(C_{14:0} + C_{16:0} + C_{18:0}) / [0.5 \times \Sigma MUFA + 0.5 \times \Sigma PUFA_{n-6} + 3 \times \Sigma PUFA_{n-3} + PUFA_{n-3} / PUFA_{n-6}]$ .

<sup>c</sup>Cholesterolemic index =  $\Sigma (C_{18:1} + C_{18:2} + C_{18:3n-3} + C_{18:3n-6} + C_{20:2} + C_{20:3} + C_{20:4} + C_{20:5} + C_{22:6}) / \Sigma (C_{12:0} + C_{14:0} + C_{16:0})$ .

**Table S3.** Sugar ratios, sweetness, total sweetness, sour and maturity indexes of service tree fruits.

| Indexes and ratios                             | Value |
|------------------------------------------------|-------|
| Suc/Glc                                        | 0.12  |
| Glc/Fru                                        | 0.72  |
| Sweetness index                                | 56.89 |
| Total sweetness index                          | 38.69 |
| Sour index                                     | 1.47  |
| Total sugars/Titrable acidity (Maturity index) | 21.80 |

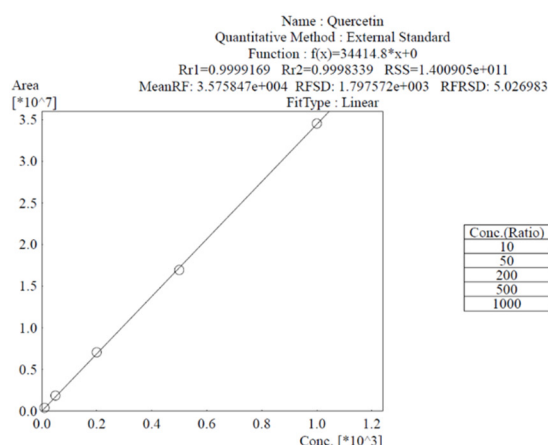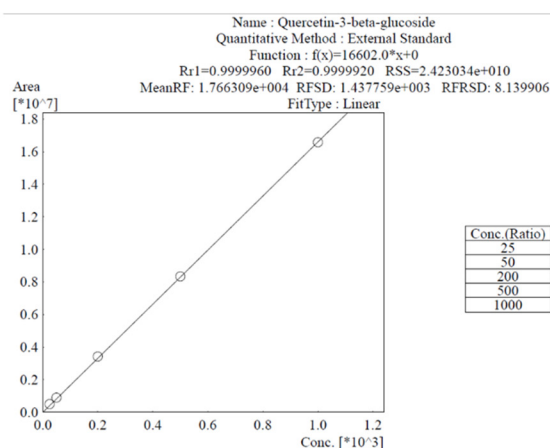

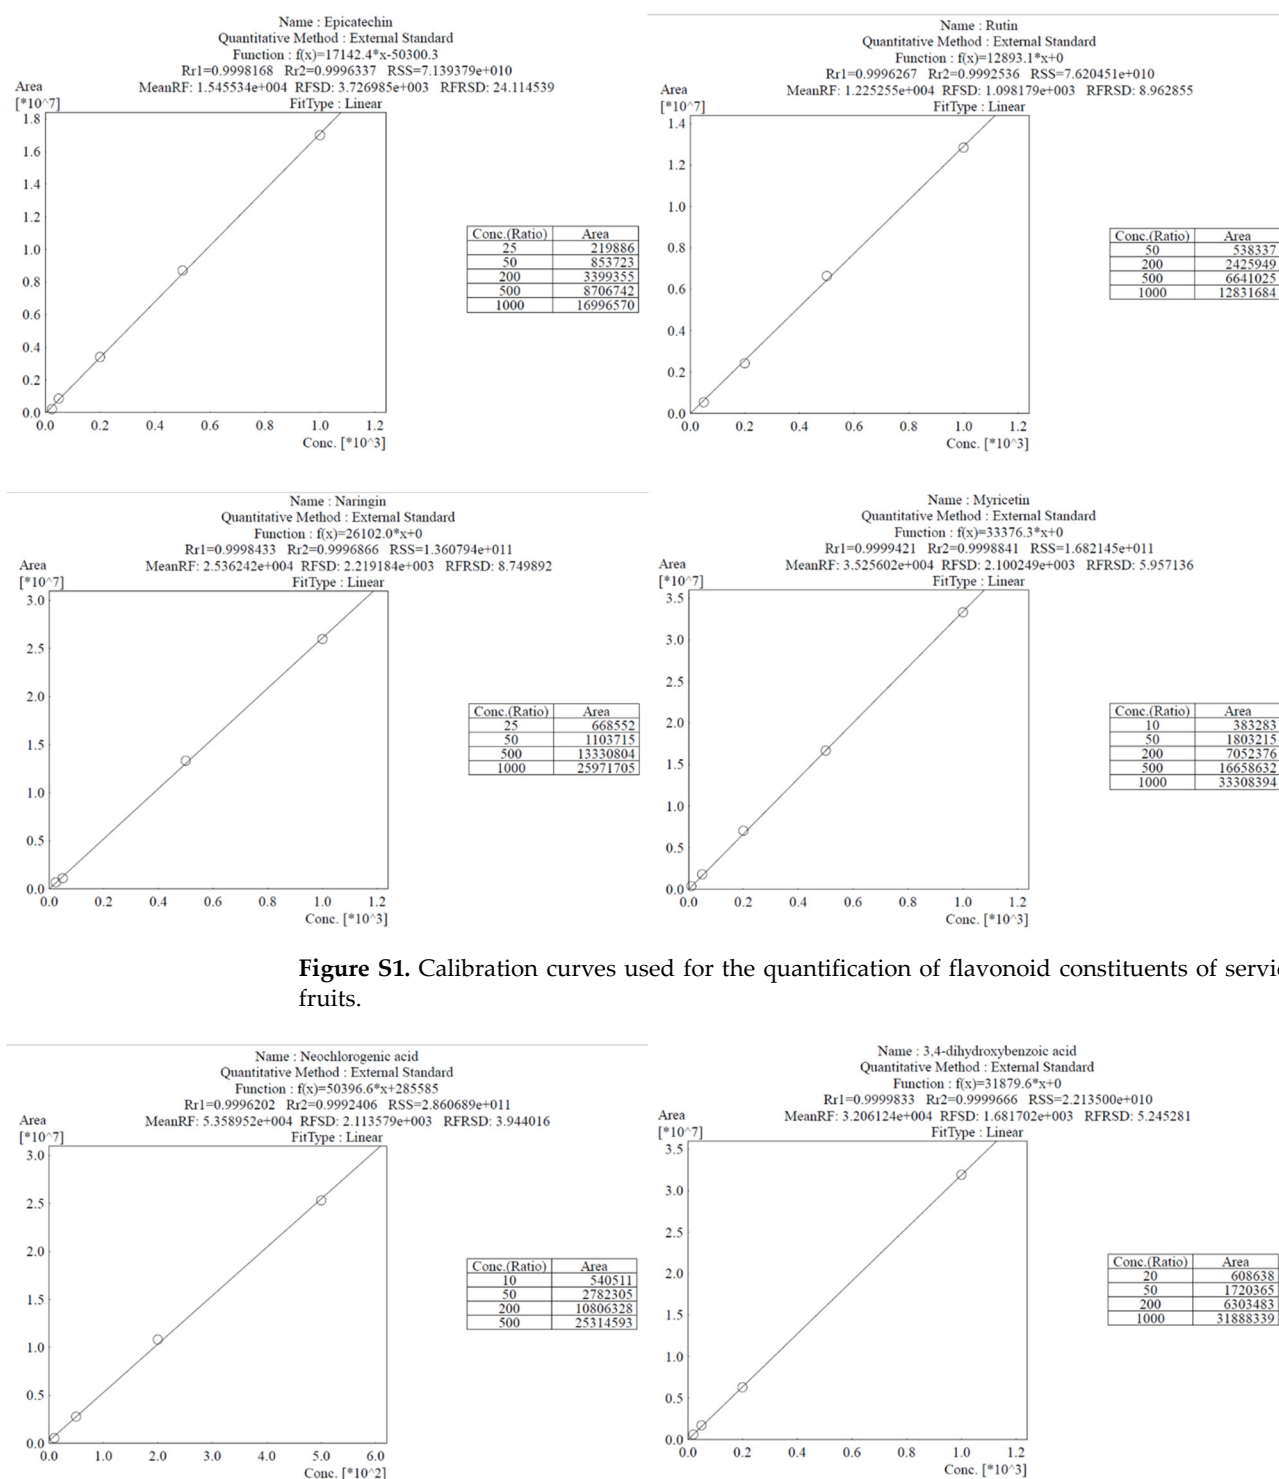

**Figure S1.** Calibration curves used for the quantification of flavonoid constituents of service tree fruits.

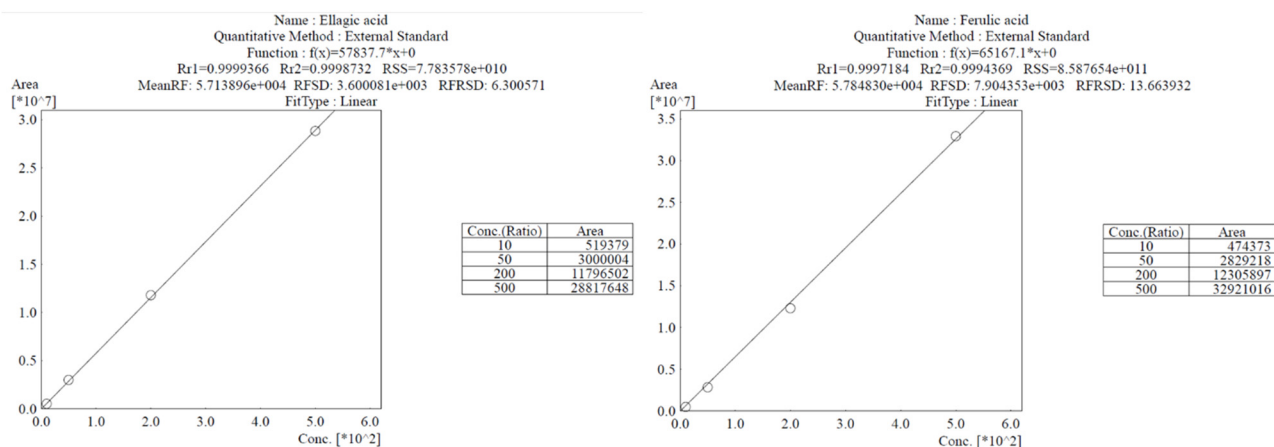

**Figure S2.** Calibration curves used for the quantification of phenolic acids of service tree fruits.
